# 1 Molecular foundations of Precambrian uniformitarianism

2  
3 **Mateusz Kędzior<sup>1</sup>, Amanda K. Garcia<sup>1</sup>, Meng Li<sup>2</sup>, Arnaud Taton<sup>3</sup>, Zachary R. Adam<sup>4</sup>, Jodi N.**  
4 **Young<sup>3</sup> and Betül Kaçar<sup>1,4\*</sup>**

5  
6 <sup>1</sup>Department of Molecular and Cellular Biology, University of Arizona, Tucson, AZ

7 <sup>2</sup>School of Oceanography, University of Washington, Seattle, WA

8 <sup>3</sup>Division of Biological Sciences, University of California San Diego, La Jolla, CA

9 <sup>4</sup>Department of Planetary Sciences, Lunar and Planetary Laboratory, University of Arizona, Tucson, AZ

10 \*Corresponding author: [betul@arizona.edu](mailto:betul@arizona.edu)

11  
12 Keywords: RuBisCO, carbon fixation, carbon isotope record, molecular paleobiology, paleogenetics,  
13 ancestral sequence reconstruction

## 14 15 Abstract

16  
17 Uniformitarian assumptions underlie the oldest evidence for living organisms on Earth, the distinct  
18 isotope fractionation between inorganic and organic carbon. Aside from a handful of compelling  
19 deviations, the <sup>13</sup>C/<sup>12</sup>C isotopic mean of preserved organic carbon ( $\delta^{13}\text{C}_{\text{org}}$ ) has remained remarkably  
20 unchanged through time. RuBisCO is the principal carboxylase/oxygenase biomolecular component that  
21 is thought to primarily account for the generation of these distinct carbon isotopic signals. However, it is  
22 difficult to reconcile a mostly unchanging mean  $\delta^{13}\text{C}_{\text{org}}$  with several known factors that can affect the  
23 isotope fractionation of RuBisCO, such as atmospheric composition and the amino acid composition of  
24 the enzyme itself, which have each changed markedly over Earth history. Here we report the resurrection  
25 and genetic incorporation of a Precambrian-age, Form IB RuBisCO in a modern cyanobacterial host. The  
26 isotopic composition of biomass relative to CO<sub>2</sub> ( $\epsilon_p$ ) in ancestral and control strains were much greater  
27 when grown under Precambrian CO<sub>2</sub> concentrations compared to modern ambient levels, but displaying  
28 values within a nominal envelope of modern-day RuBisCO IB enzyme variants. We infer that these isotopic  
29 differences derive indirectly from the decreased fitness of the AncIB strain, which includes diminished  
30 growth capacity and total cell RuBisCO activity. We argue that to answer the greatest questions of deep-  
31 time paleobiology, ancient biogeochemical signals should be reproduced in the laboratory through the  
32 synthesis of the geologic record with experimentally-derived constraints on underlying ancient molecular  
33 biology.

## 34 35 Significance Statement

36  
37 The earliest geochemical indicators of microbes, and the enzymes that powered them, extend back almost  
38 3.8 billion years on our planet. Paleobiologists often attempt to understand these indicators by assuming  
39 that the behaviors of modern microbes and enzymes are consistent (uniform) with those of their  
40 predecessors. This assumption seems uncomfortably at odds with the great variability of Earth's

41 environment and its highly adaptive microbes. Here we examine whether a uniformitarian assumption for  
42 an enzyme thought to generate these indicators, RuBisCO, can be corroborated by independently studying  
43 the history of changes recorded within RuBisCO's genetic sequences. We outline a new approach to  
44 paleobiology that informatively links molecule-level evolutionary changes with planet-level geochemical  
45 conditions in Earth's deep past.

46

## 47 **Introduction**

48

49 The history of life on Earth may be broadly subdivided into two, mutually exclusive macroevolutionary  
50 phases, the Phanerozoic and the Precambrian (1). The Phanerozoic (~542 million years ago to present)  
51 may be characterized by physiological and anatomical innovations and their resultant effects on  
52 ecosystem expansion, trophic tiering, and sociality (2-4). Hard- and soft-anatomical preservation provides  
53 a rich template for reconstructing Phanerozoic adaptive trends, correlating them with geographical and  
54 climatological changes (5, 6), and for testing observed diversity trends against possible systematic effects  
55 of preservation bias (7-9). By contrast, the Precambrian (the ~4 billion years preceding the Phanerozoic)  
56 is primarily characterized by genetic and metabolic biomolecular innovations, traded amongst  
57 microscopic organisms of uncertain phylogenetic assignment (10, 11). The Precambrian record of  
58 evolutionary change appears to be cryptic and may have been comparatively static. This may be  
59 attributable to macroevolutionary dynamics that were distinctly non-Phanerozoic, or it may merely  
60 indicate a lack of direct paleontological and geological evidence of the specific timing and extent of  
61 intermediate biomolecular adaptive steps (1).

62

63 Comparative analyses of extant organisms have traditionally been the most informative means of  
64 interpreting the scant direct evidence of Precambrian life, but such analyses inevitably face pitfalls. A  
65 reasonable null hypothesis is that evolution is largely a uniformitarian process, such that rates or tempos  
66 may change but the underlying processes or modes of evolutionary change (as established through  
67 observations of the more comprehensive Phanerozoic record) are likely invariant in deep time (12).  
68 Uniformitarian assumptions of ancient biology inferred from extant or Phanerozoic phenotypes are often  
69 employed to make sense of the Precambrian record, including body plan function (13, 14), cladistic  
70 assignment (15-18), and isotope biosignature traces (19-23). However, more recent studies complicate  
71 the use of uniformitarian assumptions, namely indicating that modes of biological variation can actually  
72 vary through time (12). A major crux of the problem is that even the simplest modern organisms, as well  
73 as the macromolecules that compose them, differ from their ancient predecessors in having been shaped  
74 by the cumulative effects of billions of years of Earth-life co-evolution and ecosystem upheaval. For this  
75 reason, Precambrian functional or sequence comparisons may be of limited utility at organismal or  
76 biomolecular levels of adaptation, undercutting interpretations made possible by uniformitarian  
77 assumptions. Novel experimental approaches may help to distinguish inferred paleobiological phenotypes  
78 from characteristically modern adaptive overprints.

79

80 The interpretation of the Precambrian carbon isotope record, comprising the oldest signatures of life on  
81 Earth, may be aided by novel experimental constraints on ancient phenotypes. Interpretations of this  
82 record is conventionally subject to uniformitarian assumptions regarding ancient biogeochemistry (19,  
83 24). The  $^{13}\text{C}/^{12}\text{C}$  isotopic mean of preserved organic carbon ( $\delta^{13}\text{C}_{\text{org}} \approx -25\text{‰}$ ) has remained notably static  
84 over geologic time (19, 21, 24), and is leveraged as a general signature of ancient biological activity (25-

85 27). Given its role in the Calvin-Benson-Bassham cycle—likely the predominant mode of carbon fixation  
86 for much of Earth history (19)—the majority of contextual information used to assess how carbon isotope  
87 biosignatures might have been generated over Earth’s deep history comes from studies of the modern  
88 enzyme RuBisCO (Ribulose 1,5-Bisphosphate (RuBP) Carboxylase/Oxygenase, EC 4.1.1.39). RuBisCO  
89 catalyzes the uptake of inorganic CO<sub>2</sub> from the environment and facilitates CO<sub>2</sub> reduction and  
90 incorporation into organic biomass. The <sup>13</sup>C/<sup>12</sup>C isotopic fractionation of modern Form I RuBisCO variants  
91 in photosynthetic organisms consistently measures ~-25‰ (28-31), approximately the same isotopic  
92 difference observed between inorganic and organic carbon in the Precambrian rock record. The carbon  
93 isotope discrimination of RuBisCO has therefore been presumed to have remained constant over the  
94 history of life. Recent data, however, demonstrate that RuBisCO can produce significantly different carbon  
95 isotope signatures within organic matter in response to external factors, such as levels of atmospheric  
96 CO<sub>2</sub> and/or O<sub>2</sub> (32-35) or cellular carbon concentrating mechanisms, which affect the catalytic efficiency  
97 of RuBisCO (36-38). Internal factors may also affect fractionation, such as single-point mutations that can  
98 alter the interaction between RuBisCO and CO<sub>2</sub> (39). Given the sensitivity of RuBisCO to both external and  
99 internal variables, it seems unlikely that ancestral forms under ancient environmental conditions  
100 generated the same isotope fractionation signal as descendent homologs in modern organisms. An  
101 experimental assessment that combines the phylogenetic history of RuBisCO with the study of intra- and  
102 extracellular conditions may provide a more insightful basis for comparing extant and Precambrian carbon  
103 isotope fractionation patterns.

104  
105 The Form I clade of the RuBisCO phylogeny (and its macroevolutionary tractability afforded through green  
106 plant, algal and cyanobacterial fossil lineages) makes it an exemplary paleomolecular system for assessing  
107 uniformitarian assumptions applied to Precambrian biosignatures. Here, we establish an experimental  
108 system for the reconstruction of ancestral biomolecules with which to interpret evidence of Precambrian  
109 biological activity. Specifically, we report the resurrection and genetic incorporation of a phylogenetically  
110 reconstructed, ancient Form IB RuBisCO variant in a modern strain of cyanobacteria, *Synechococcus*  
111 *elongatus* PCC 7942 (thereafter *S. elongatus*) (40, 41). We compared expression and activity levels of  
112 RuBisCO variants and the resulting changes in the growth of *S. elongatus* and isotope fractionation under  
113 ambient air as well as a CO<sub>2</sub> concentration that reflects Precambrian conditions.

114

## 115 **Results**

116

117 **Construction of a *S. elongatus* strain harboring ancestral RuBisCO.** To experimentally investigate the  
118 generation of carbon isotope biosignatures in deep time, we designed a paleomolecular system to  
119 engineer computationally inferred, ancestral RuBisCO enzymes in extant cyanobacteria. We previously  
120 reconstructed a comprehensive phylogenetic history of RuBisCO and inferred maximum-likelihood  
121 ancestral RuBisCO large-subunit (RbcL) protein sequences (42) (Fig. 1A). For this study, we selected the  
122 ancestor of the Form IB RuBisCO clade (cyanobacteria, green algae, and land plants) for laboratory  
123 resurrection, designated "AncIB." Chlorophyte and land plant RuBisCO homologs are nested among  
124 cyanobacterial sequences within the Form IB clade. The Form IB topology therefore recapitulates a  
125 primary plastid endosymbiotic history from cyanobacterial to Chlorophyte ancestors (43-45) and  
126 constrains the minimum age of ancestral Form IB to older than the Archaeplastida. As a conservative  
127 estimate, AncIB is thus likely older than ~1 Ga (the age of the oldest well-characterized, crown-group red  
128 and green algal fossils (16, 46)) and younger than maximum age estimates of cyanobacteria (~3 Ga, as

129 constrained by oxidized sediments potentially indicating the early presence of oxygenic photosynthesis  
130 (47, 48).

131  
132 The ancestral AnclB and *S. elongatus* native RbcL proteins differ at 37 sites and share 92% amino acid  
133 identity (Fig. 2). This site variation is evenly spread across the length of the protein, except for a highly  
134 conserved region between approximately site 170 to 285 (site numbering here and hereafter based on  
135 aligned WT *S. elongatus* RbcL; Fig. 2A) that constitutes a portion of the catalytic C-terminal domain and is  
136 proximal to the L-L interface and active site. Critical residues for carboxylase activity, including the Lys-  
137 198 site that binds CO<sub>2</sub>, are conserved in AnclB. Homology modeling of AnclB using the *S. elongatus* RbcL  
138 template (PDB: 1RBL (49)) indicates high structural conservation without predicted disruption to  
139 secondary structure (Fig. 2B). The nucleotide sequence for the reconstructed AnclB RbcL protein was  
140 codon-optimized for *S. elongatus* and cloned within a copy of the *rbc* operon into pSyn02 (50) for insertion  
141 into the *S. elongatus* chromosomal neutral site 2 (NS2). The native *rbc* operon was subsequently deleted  
142 to create the AnclB strain. In addition, we generated the control strain Syn01 harboring WT *rbcL* at NS2  
143 (see Materials and Methods for full genome strategy). Thus, the AnclB and Syn01 strains carry a single  
144 ectopic copy of the *rbc* operon at NS2 and only differ in the coding sequence of the large RuBisCO subunit  
145 (Table 1).

146  
147 **Ancestral RuBisCO complements photoautotrophic growth of extant *S. elongatus*.** We cultured wild-  
148 type (WT) and engineered (AnclB and Syn01) strains of *S. elongatus* in both ambient air and 2% CO<sub>2</sub> to  
149 evaluate the physiological impact of ancestral RuBisCO under estimated Precambrian CO<sub>2</sub> concentrations  
150 (51) (Fig. 3A). The AnclB strain was capable of photoautotrophic growth in both ambient air and 2% CO<sub>2</sub>.  
151 Maximum growth rates for all strains were relatively comparable under each atmospheric condition  
152 (averaging doubling times of ~15 to 20 hours), and generally increased under 2% CO<sub>2</sub> relative to air ( $p <$   
153  $0.001$ ; Table 2). The AnclB strain exhibited a significantly diminished maximum cell density ( $OD_{750} \approx 5$ )  
154 relative to both WT and Syn02 strains ( $OD_{750} \approx 8$ ;  $p < 0.001$ ). No significant difference between WT and  
155 Syn01 growth rate or maximum cell density was observed under ambient air or 2% CO<sub>2</sub>. In addition, a  
156 moderate increase in the midpoint time for the AnclB strain was observed under air, indicating lag in  
157 growth ( $p < 0.01$ ). These growth parameters taken together suggest decreased fitness of the AnclB strain  
158 relative to WT and Syn01.

159  
160 AnclB RuBisCO protein produced a more modest impact on the oxygen evolution of *S. elongatus* compared  
161 to that on growth parameters. Cell suspensions were briefly incubated in the dark and subsequently  
162 exposed to saturated light in an electrode chamber to detect evolution of molecular oxygen (normalized  
163 to chlorophyll *a* concentration (52)). For cells sampled from cultures grown in air, there was no statistical  
164 difference detected between any of the WT, Syn01, or AnclB strains (Fig. 3B). We did find a modest but  
165 significant decrease in photosynthetic activity for AnclB relative to WT for cells cultured in 2% CO<sub>2</sub>,  
166 generating ~200 and ~320 nmol O<sub>2</sub>·h<sup>-1</sup>·μg<sup>-1</sup> chlorophyll *a*, respectively. However, a slower O<sub>2</sub> evolution  
167 rate was also observed for Syn01 at 2% CO<sub>2</sub>.

168  
169 **Ancestral RuBisCO is overexpressed and less catalytically active relative to WT.** We assessed the impact  
170 of ancestral RuBisCO on gene expression at both the transcript and protein levels. *S. elongatus rbcL*  
171 transcript was measured by quantitative reverse-transcription PCR (RT-qPCR) and normalized to that of  
172 the *secA* reference gene (53). For strains cultured in ambient air, we found that the AnclB strain produced

173 a ~29-fold increase in *rbcL* transcript relative to WT or the control strain Syn01 ( $p < 0.001$ ; Fig. 4A). The  
174 magnitude of AncIB *rbcL* overexpression was lower in 2% CO<sub>2</sub>, with a ~4 and ~2-fold increase observed  
175 relative to WT and the control strain, respectively ( $p < 0.001$ ).

176  
177 RbcL protein was quantified for all *S. elongatus* strains by immunodetection using rabbit anti-RbcL  
178 antibody. We found that the amount of RbcL protein was also increased in the AncIB strain by ~3-fold ( $p$   
179  $< 0.05$ ) and ~5-fold ( $p < 0.001$ ) relative to WT or Syn01 in air and 2% CO<sub>2</sub>, respectively (Fig. 4B). No  
180 difference in RbcL quantity was detected between WT and Syn01 strains at either atmospheric condition.  
181 Finally, we confirmed assembly of the hexadecameric L<sub>8</sub>S<sub>8</sub> RuBisCO complex in the AncIB strain by native  
182 PAGE and detection by anti-RbcL antibody (Fig. S1).

183  
184 The total carboxylase activity of *S. elongatus* harboring ancestral RuBisCO was measured from crude cell  
185 lysates. Activity was assessed by an *in vitro* spectrophotometric coupled-enzyme assay that measures  
186 NADH oxidation and is reported as the RuBP consumption rate normalized to total soluble protein content  
187 (54). For two sets of assays using either 2.5 mM or 5 mM HCO<sub>3</sub><sup>-</sup>, AncIB lysate generated less than half the  
188 carboxylase activity of WT lysate ( $p < 0.05$ ) (Fig. 4C).

189  
190 ***S. elongatus* harboring ancestral RuBisCO produces greater carbon isotopic fractionation than wild-**  
191 **type.** We measured the carbon isotope discrimination of *S. elongatus* strains cultured in ambient air and  
192 2% CO<sub>2</sub> to evaluate how the fractionation behavior of ancestral RuBisCO might influence the  
193 interpretation of ancient isotopic biosignatures preserved in the geologic record. The <sup>13</sup>C/<sup>12</sup>C carbon  
194 isotope composition of *S. elongatus* was measured for biomass ( $\delta^{13}\text{C}_{\text{biomass}}$ ) as well as dissolved inorganic  
195 carbon (DIC;  $\delta^{13}\text{C}_{\text{DIC}}$ ) in the growth medium (Table S1). We calculated the carbon isotope fractionation  
196 associated with photosynthetic CO<sub>2</sub> fixation ( $\epsilon_p$ ) following Freeman and Hayes (33) after estimating  $\delta^{13}\text{C}_{\text{CO}_2}$   
197 from measured  $\delta^{13}\text{C}_{\text{DIC}}$  (55, 56) (see Materials and Methods).

198  
199 Overall,  $\epsilon_p$  values were greater for *S. elongatus* strains cultured in 2% CO<sub>2</sub> compared to ambient air. At 2%  
200 CO<sub>2</sub>,  $\epsilon_p$  ranged between 21‰ and 26‰ compared to only 8‰ and 14‰ in air. We found that *S. elongatus*  
201 engineered with AncIB RbcL had an  $\epsilon_p$  ~5‰ greater than both WT and Syn01 when cultured in air ( $p <$   
202  $0.001$ ) and ~2‰ to 4‰ greater than WT and Syn01 when cultured at 2% CO<sub>2</sub> ( $p < 0.01$ ) (Fig. 1C), though  
203 these differences in  $\epsilon_p$  appear driven by the inorganic carbon pool composition rather than biomass (Table  
204 S1). A substantially smaller increase in  $\epsilon_p$  (~1‰;  $p < 0.001$ ) was observed for Syn01 relative to WT under  
205 ambient air. Conversely, under 2% CO<sub>2</sub>, Syn01  $\epsilon_p$  was decreased by ~2‰ ( $p < 0.001$ ) relative to WT.

206

## 207 Discussion

208

209 Form IB ancestral RuBisCO, when engineered into an extant strain of *S. elongatus*, decreased both the  
210 organismal growth capacity and the total cell RuBisCO activity. The genetic engineering strategy for  
211 insertion of the AncIB *rbcL* sequence in the cyanobacterial genome cannot solely account for these  
212 physiological differences since differences between the WT and Syn01 control strains were insignificant  
213 for most measured properties, or not comparable in magnitude to differences between the WT and AncIB  
214 strains. Rather, the observed differences for the AncIB strain indicate that the resultant phenotype is likely  
215 attributable to the functionality of the ancestral enzyme itself. The unique phenotype of the AncIB strain  
216 could be a direct result of the ancestral RbcL subunit or due to impediments to the assembly and activation



217 of a hexadecamer RuBisCO complex containing both the ancestral RbcL and modern RbcS subunits.  
218 Another possibility is hampered integration of ancestral RbcL given a modern suite of associated proteins  
219 required for RuBisCO folding and assembly (57). Further, while overexpression of the ancestral RbcL  
220 occurred at the level of transcription and translation, the ancestral strain appears to have comparable  
221 levels of assembled hexadecamer RuBisCO, suggesting lower rates of RuBisCO assembly (or faster  
222 degradation). Even lower rates of measured total carboxylase activity suggest that the AncIB has  
223 decreased efficacy, which could be directly representing ancestral RuBisCO kinetics as well as the  
224 challenges associated with hybrid enzyme activation and activity.

225  
226 Overexpression of the amount of ancestral RuBisCO shown by RT-qPCR and immunodetection assays is a  
227 common physiological response to decreased enzymatic efficacy throughout the cell (e.g., (58, 59)).  
228 However, expression compensation is insufficient to fully restore the extant WT phenotype, as indicated  
229 by the reduced fitness (i.e., decreased maximum cell density, oxygen evolution, and total carboxylase  
230 activity) of the ancestral strain harboring the ancestral RuBisCO compared to WT and Syn01.

231  
232 There are few *in vitro* measurements of the kinetic isotope effect of Form IB RuBisCO in modern-day  
233 organisms, but those available range from ~22‰ to 28‰ for cyanobacteria and C<sub>3</sub> plants, respectively  
234 (28-31). The ~26‰  $\epsilon_p$  of AncIB strain biomass grown under 2% CO<sub>2</sub> suggests that the ancestral RuBisCO  
235 also fractionates within this range. It has been theorized that RuBisCO kinetics have adapted in response  
236 to CO<sub>2</sub> availability, either due to increased environmental CO<sub>2</sub> (36) or the emergence of CCMs (e.g., C<sub>4</sub>  
237 photosynthesis in plants (60)). Considering the positive relationship between enzymatic fractionation and  
238 RuBisCO's specificity to CO<sub>2</sub> (36), reconstructing ancient RuBisCO kinetic isotope effect could provide  
239 insights into the co-evolution of atmospheric concentrations of CO<sub>2</sub> and O<sub>2</sub> and carbon fixation strategies  
240 during the Precambrian, in particular the emergence of carbon concentrating mechanisms (CCMs) (34,  
241 61-63). This is relevant as precise estimates of the magnitude of atmospheric CO<sub>2</sub> elevation during the  
242 Precambrian relative to the present, as well as the emergence and effectiveness of Precambrian CCMs,  
243 are unknown.

244  
245 We did observe statistically significant differences in  $\epsilon_p$  of the ancestral strain compared to WT *S.*  
246 *elongatus* under both ambient air and 2% CO<sub>2</sub> atmospheric conditions. However, upon inspection it  
247 appears that the diminished activity of the AncIB strain is influencing the composition of the DIC pool  
248 (both  $\delta^{13}\text{C}$  and concentration) in our cultures, and it is in fact the differences in DIC composition driving  
249 the calculated differences in  $\epsilon_p$ . Though strains were harvested at similar cell densities, small differences  
250 in cell concentrations at high densities can strongly influence carbonate chemistry of the media (64). The  
251 lower CO<sub>2</sub> availability in the air treatment is more sensitive to cellular influence, resulting in a larger  
252 difference in  $\epsilon_p$  compared to the 2% CO<sub>2</sub> treatment. These differences in DIC are unlikely to be due to  
253 experimental setup (e.g., variations in CO<sub>2</sub> bubbling), as biological replicates showed similar values.  
254 Therefore, the differences in fractionation reported here are likely implicated indirectly with the less  
255 efficient AncIB ancestral enzyme. Further comparative biomolecular characterization of AncIB and WT *S.*  
256 *elongatus* RbcL forms is needed to determine the degree to which enzymatic inefficiencies are  
257 contributing directly to the AncIB strain phenotype.

258  
259 The observed carbon isotopic fractionation values corroborate a uniformitarian assumption for applying  
260 the maximal range of extant organism-level isotope fractionation values to interpret deep time isotopic

261 biosignatures. There are, however, several potentially important contextual caveats. The most obvious is  
262 that the isotopic fractionation values of all strains (WT, Syn01, and AncIB) are increased under simulated  
263 Precambrian conditions with elevated CO<sub>2</sub>. The Form IB ancestor represents predecessors that are at least  
264 1 billion years old, but it is also genetically and functionally still likely to be very different from the putative  
265 'root' or common ancestor of all RuBisCO variants that emerged much earlier. Reconstruction of older  
266 ancestors may further expand this maximal envelope of RuBisCO-generated carbon fractionation, or it  
267 may indicate that the extant maximal envelope is pervasive (and perhaps characteristic) across all  
268 functional variants of RuBisCO.

269  
270 Another important caveat lies in the observation that, whereas all strains produce increased isotopic  
271 fractionation under elevated CO<sub>2</sub>, the comparative difference between ancestral AncIB and WT RbcL  
272 fractionation is relatively muted under 2% CO<sub>2</sub> relative to ambient air. One possibility is that elevated CO<sub>2</sub>  
273 brings the intrinsic fractionation properties of RuBisCO into relief (35, 65-67), at least compared to  
274 fractionation effects deriving from the overlying organismal physiology. By contrast, in present-day  
275 conditions, RuBisCO-mediated fractionation processes may be more significantly overprinted by physical  
276 factors that can affect RuBisCO catalytic efficiency, including cellular diffusion of O<sub>2</sub>/CO<sub>2</sub> or other factors  
277 such as the presence of carbon concentration mechanisms.

278  
279 There are many fundamental attributes of extant and ancestral metabolism for which the systemic effects  
280 on biosignature production have yet to be characterized. Disentangling these effects is critical for  
281 interpretation of the oldest biogeochemical record. A host cyanobacterium *S. elongatus* engineered with  
282 a Form IB RbcL ancestor confirms that organism- and enzyme-level effects on biosignature production are  
283 not always synonymous but differ in nuanced ways. These differences are contingent upon changes to  
284 internal (cellular, physiological) and external (environmental) conditions that have demonstrably varied  
285 over Earth's long history. Cyanobacteria, with well-characterized genetic and morphological features (40,  
286 41, 61-63) and a tractable paleobiological history (18, 68), are ideal hosts for investigating a range of early  
287 Precambrian metabolic processes (68-70).

288  
289 Discernible trends (or steadfast consistencies) in metabolic outputs over macroevolutionary timescales  
290 can lead to foundational uniformitarian approaches to deep time molecular paleobiology. The available  
291 rock record becomes vanishingly sparse with greater age, but it is arguably well-sampled across key global-  
292 scale and biotically relevant isotopic systems at least through the early Archaean. Greater geologic  
293 sampling will therefore likely generate diminishing returns for shedding new light on deep time  
294 paleobiological trends. Innovative approaches that can chart a comprehensive envelope of biomolecular  
295 variability over time are a promising new means of reconciling coarse geochemical data with the nuance  
296 and complexity of ancient biological activity.

297  
298 The engineering of ancient-modern hybrid organisms and their characterization can be used to  
299 complement the existing array of fossil remains, biogeochemical signatures, and modern organismal and  
300 molecular proxies to assess and contextualize plausible ranges of Precambrian carbon isotope  
301 biosignature production. Hybrid organisms may be particularly useful to disentangle the regulatory,  
302 physiological, and inter- and intramolecular factors that have impacted isotope fractionation, none of  
303 which are individually expressed in the geologic record. These factors must be systematically accounted

304 for when interpreting bulk fractionation signals, even if only to elucidate the evolutionary molecular  
305 underpinnings of uniformitarian phenomena over geologic time.

306

## 307 **Conclusions**

308

309 After engineering a cyanobacterium with an ancient RuBisCO large protein subunit and cultivating it under  
310 conditions that mimic those prevailing through much of the Precambrian, we found the resultant carbon  
311 isotope fractionation to be within the range of organisms utilizing modern Form IB RuBisCO. The  
312 underlying biomolecular and organismal adjustments made by the cell to accommodate the ancestral  
313 gene were tracked, and we conclude that the small fractionation differences observed are likely  
314 attributable indirectly to decreased fitness of the AncIB strain, which influenced the inorganic carbonate  
315 chemistry of the media. The consistency of isotopic signatures generated by this strain indicates that  
316 uniformitarian assumptions based on the range of phenotypes of modern RuBisCO variants may apply for  
317 Precambrian environmental conditions, but that further study is warranted to discern organism- and  
318 enzyme-level trends in carbon isotope fractionation that may extend deeper into the early Precambrian.

319

## 320 **Materials and Methods**

321

322 **Inference of ancestral AncIB RbcL protein sequence.** A RuBisCO RbcL phylogeny was reconstructed as  
323 previously described (42). Briefly, RbcL orthologs were identified from the NCBI protein database by BLAST  
324 (sequence dataset and the tree can be found at <https://github.com/kacarlab/rubisco>). Phylogenetic  
325 analysis was performed by Phylobot (71), a web portal that integrates alignment, phylogenetic  
326 reconstruction by RAxML (72), and ancestral sequence inference by PAML (73). A maximum likelihood  
327 phylogeny was built using a MSAProbs alignment (74) and the best-fit PROTCATWAG model (75, 76),  
328 determined by the Akaike information criterion (77). Ancestral states were reconstructed at each amino  
329 acid site for all phylogenetic nodes, and gap characters were inferred according to Fitch's parsimony (78).

330

331 **Cyanobacterial growth and maintenance.** *S. elongatus* PCC 7942 strains were cultured in BG-11 medium  
332 (79) as liquid cultures or on agar plates (1.5% (w/v) agar and 1 mM Na<sub>2</sub>S<sub>2</sub>O<sub>3</sub>·5H<sub>2</sub>O). Liquid cultures were  
333 grown at 30°C, continuous shaking at 120 rpm, sparged with ambient air or 2% CO<sub>2</sub>, and with 115 μmol  
334 photon·m<sup>-2</sup>·s<sup>-1</sup> (with the exception of cultures used to prepare samples for O<sub>2</sub> evolution, which were grown  
335 with 80 μmol photon·m<sup>-2</sup>·s<sup>-1</sup>). The 2% CO<sub>2</sub> gas mix was controlled by an environment chamber (Percival,  
336 Cat. No. I36LLVLC8) with a CO<sub>2</sub> tank input. For recombinant strains, liquid and solid media were  
337 supplemented with appropriate antibiotics: 2 μg·ml<sup>-1</sup> Spectinomycin (Sp) plus 2 μg·ml<sup>-1</sup> Streptomycin  
338 (Sm), 5 μg·ml<sup>-1</sup> Kanamycin (Km). Cyanobacterial growth was measured at an optical density of 750 nm  
339 (OD<sub>750</sub>) and growth parameters were estimated using the Growthcurver package for R (80) (Growthcurver  
340 analysis script can be found at <https://github.com/kacarlab/rubisco>). Cultures were sampled at the middle  
341 exponential growth phase, i.e., at an OD<sub>750</sub> of ~2.5 (AncIB) or ~4.5 (WT and Syn01) for all subsequent  
342 experiments.

343

344 **Genetic engineering of cyanobacteria.** Recombinant strains of *S. elongatus* were constructed by natural  
345 transformation using standard protocols (81) with minor modifications (50). The plasmids and strains used  
346 in this study are listed in Table 1. The construction of *S. elongatus* Syn01, carrying a single ectopic copy of  
347 the *rbc* operon at NS2, as well as the plasmids pSyn01 and pSyn02 used to construct strain Syn01, were  
348 described previously (50). The construction of strain AncIB was performed similarly to Syn01. Briefly,



349 pSyn03, which carries the AnclB nucleotide sequence within the entire *rbc* operon (including flanking  
350 sequences and homologous regions for recombination at neutral site 2 (NS2) of the *S. elongatus*  
351 chromosome), was transformed in *S. elongatus*. Transformation of WT *S. elongatus* with pSyn03  
352 generated strain Syn03 carrying a second copy of the *rbc* operon at NS2. Strain Syn03 was subsequently  
353 transformed with pSyn01 to replace the native *rbc* operon with a spectinomycin/streptomycin resistance  
354 gene as described previously (50), producing strain AnclB. Transformants of Syn03 and AnclB were  
355 screened for complete segregation by colony PCR using primers F06, R06, F07, and R07 (Fig. S2; Table S2)  
356 and the strain sequences at the deletion and insertion sites were further verified by Sanger sequencing  
357 using the primers R07, F08, R08, F15, and F16 (Table S2). To construct plasmid pSyn03, pSyn02 excluding  
358 the *rbcL* coding sequence was PCR-amplified and linearized using primers F13/R13 and assembled with  
359 the AnclB *RbcL* coding sequence codon-optimized for *S. elongatus* and synthesized by Twist Bioscience.  
360 Both DNA fragments were assembled using the GeneArt™ Seamless Cloning and Assembly Kit (Invitrogen,  
361 Cat. No. A13288).

362  
363 **Analysis of *rbcl* expression by RT-qPCR.** Cells were pelleted by centrifugation and resuspended in TE  
364 buffer (10 mM Tris, pH 8.0, 1 mM EDTA). Total RNA was extracted using the RNeasy® Protect Bacteria Mini  
365 Kit (QIAGEN, Cat. No. 74524). DNase I-treated RNA was then used in reverse transcription (RT) performed  
366 with the SuperScript™ IV First-Strand Synthesis System (Invitrogen, Cat. No. 18091050). F09/R09,  
367 F11/R11, F14/R14 pairs of qPCR primers (Table S2) were designed with Primer3Plus  
368 (<http://www.bioinformatics.nl/cgi-bin/primer3plus/primer3plus.cgi>). The quality of cDNA and primer  
369 specificity was assessed by PCR using cDNA templates (RT positive reactions) and RT negative controls.  
370 qPCR was performed by the real-time thermal cycler qTOWER<sup>3</sup> G (Analytik Jena AG) using qPCRsoft  
371 software. The relative expression of native and AnclB *rbcl* was calculated as the average fold change  
372 normalized to the *secA* reference gene (53) using the delta-delta Ct method. The experiment was carried  
373 out using three biological replicates and three technical replicates.

374  
375 **Immunodetection of Rbcl protein.** Cells were pelleted by centrifugation and resuspended in 95°C TE  
376 buffer supplemented with 1% (w/v) SDS and incubated at 95°C for 10 min. The mixture was sonicated and  
377 centrifuged to remove cell debris. Total protein concentration in the crude cell lysates was measured using  
378 the Pierce™ BCA Protein Assay Kit (Thermo Scientific, Cat. No. 23225). Lysates containing 5 µg of total  
379 protein in Laemmli sample buffer were loaded onto a 6% (v/v) polyacrylamide stacking gel. Proteins were  
380 electrophoresed in a 12% polyacrylamide resolving gel and blotted onto a nitrocellulose membrane.  
381 Detection of Rbcl and total protein load was performed as previously described (50). The densitometric  
382 analysis of Rbcl signal intensity, normalized to total protein load, was performed with Quantity One®  
383 software (Bio-Rad) for three to six biological replicates.

384  
385 **Confirmation of RuBisCO assembly.** Assembly of the RuBisCO large and small subunits into a  
386 hexadecameric complex in each strain was evaluated by native gel electrophoresis and immunodetection,  
387 as previously described (50). Immunodetection of the RuBisCO complex was performed for three  
388 biological replicates with the same primary and secondary antibodies that were used to detect Rbcl, as  
389 described above.

390  
391 **Catalytic activity of RuBisCO.** The activity of RuBisCO in cyanobacterial lysates was measured using a  
392 spectrophotometric coupled-enzyme assay that links this activity with the rate of NADH oxidation (82).  
393 Cell lysis and the activity assay were carried out as previously described (50) with either 2.5 mM or 5 mM  
394 NaHCO<sub>3</sub>. After 20 min at 25 °C for activation of Rubisco, the reaction was initialized with the addition of  
395 ribulose 1,5-bisphosphate (RuBP) (0.5 mM) and the absorbance at 340 nm was recorded using a Synergy

396 H1 plate reader (BioTek). RuBisCO activity was reported as the RuBP consumption rate normalized to total  
397 soluble protein content. The assay was performed for three biological replicates.

398  
399 **Photosynthetic oxygen evolution rate.** *S. elongatus* strain photosynthetic activity was assayed using a  
400 Clark-type oxygen electrode chamber to measure the level of molecular oxygen produced in  
401 cyanobacterial cultures. Cells were pelleted and resuspended in fresh BG-11 to an OD<sub>750</sub> of ~1 following  
402 De Porcelinis (83). Concentration of chlorophyll *a* (for normalization) was measured following the protocol  
403 by Zavrel et al. (84). The remaining suspension was incubated in the dark for 20 min with gentle agitation.  
404 Samples from each suspension were analyzed in an oxygen electrode chamber under saturated light, using  
405 the Oxygraph+ System (Hansatech Instruments) equipped with the OxyTrace+ software. Oxygen evolution  
406 rate was monitored for 10 min and expressed as nanomoles of molecular oxygen evolved per hour per  
407 microgram of chlorophyll *a*. The assay was performed for three biological replicates.

408  
409 **Carbon isotope fractionation in bulk cyanobacterial biomass.** Cells were pelleted by centrifugation and  
410 washed in 10 mL of 10 mM NaCl (OD<sub>750</sub> for Syn-1 ~ 4.5, OD<sub>750</sub> for AncIB ~2.5). Pellets were then dried at  
411 50°C. In parallel, the supernatant from centrifuged culture samples was sterilized through 0.2 µm filtration  
412 for DIC isotopic analysis of growth media. Sterilized media was transferred to Exetainer vials leaving no  
413 headspace and stored at 4°C until analysis. Isotopic analysis was performed for three biological replicates.  
414 The carbon isotope composition of bulk biomass ( $\delta^{13}\text{C}_{\text{biomass}}$ ) and DIC ( $\delta^{13}\text{C}_{\text{DIC}}$ ) was determined at the UC  
415 Davis Stable Isotope Facility.  $\delta^{13}\text{C}_{\text{biomass}}$  was analyzed using a PDZ Europa ANCA-GSL elemental analyzer  
416 interfaced to a PDZ Europa 20-20 isotope ratio mass spectrometer (Sercon Ltd.). DIC samples were  
417 analyzed by gas evolution and composition was measured by a GasBench II system interfaced to a Delta  
418 V Plus IRMS (Thermo Scientific). The carbon isotopic composition values were reported relative to the  
419 Vienna PeeDee Belemnite standard (V-PDB):

420

$$\delta^{13}\text{C}_{\text{sample}} = \left( \frac{{}^{13}\text{C} / {}^{12}\text{C}_{\text{sample}}}{{}^{13}\text{C} / {}^{12}\text{C}_{\text{V-PDB}}} - 1 \right) \times 1000$$

421

422

423 The isotopic composition of dissolved molecular CO<sub>2</sub> ( $\delta^{13}\text{C}_{\text{CO}_2}$ ) was estimated from  $\delta^{13}\text{C}_{\text{DIC}}$  following Rau et  
424 al. (55) and Mook et al. (56):

425

$$\delta^{13}\text{C}_{\text{CO}_2} = \delta^{13}\text{C}_{\text{DIC}} + 23.644 - \frac{9701.5}{T_K}$$

426

427

428 The carbon isotope fractionation associated with photosynthetic CO<sub>2</sub> fixation ( $\epsilon_p$ ) was calculated relative  
429 to  $\delta^{13}\text{C}_{\text{CO}_2}$  in the post-culture medium according to Freeman and Hayes (1992):

430

$$\epsilon_p = \frac{\delta^{13}\text{C}_{\text{CO}_2} - \delta^{13}\text{C}_{\text{biomass}}}{1 + \delta^{13}\text{C}_{\text{biomass}} / 1000}$$

431

432

433 **Statistical analyses.** Results for experimental analyses were presented as the mean and the sample  
434 standard deviation (1σ) values of at least three biological replicates. For comparisons of two groups,  
435 statistical significance was analyzed by an unpaired, two-tailed *t*-test assuming equal variance. For  
436 comparisons of three or more groups, significance was analyzed by one-way ANOVA and a post-hoc Tukey  
437 HSD test.

## 438 Acknowledgements

439  
440 We sincerely thank Emily Peñaherrera, Jenan Kharbush, Ryan Ward, Sky Dominguez, and the University  
441 of California-Davis Stable Isotope Facility for assistance. This work was supported by the National  
442 Aeronautics and Space Administration Early Career Faculty (ECF) Award No. 80NSSC19K1617 (BK), the  
443 National Science Foundation Emerging Frontiers Program Award No. 1724090 (BK), National Aeronautics  
444 and Space Administration Postdoctoral Fellowship (AKG), Simons Foundation Early Career Award No.  
445 561645 (JNY and ML), and National Institute of General Medical Sciences of the National Institutes of  
446 Health award number R01GM118815 (AT, to James W. Golden at the University of California-San Diego).  
447

## 448 References

- 449
- 450 1. N. J. Butterfield, Macroevolution and Macroecology through Deep Time. *Palaeontology* **50**, 41-  
451 55 (2007). <https://doi.org/10.1111/j.1475-4983.2006.00613.x>
  - 452 2. B. Hannisdal, S. E. Peters, Phanerozoic Earth System Evolution and Marine Biodiversity. *Science*  
453 **334**, 1121-1124 (2011). <https://doi.org/10.1126/science.1210695>
  - 454 3. R. K. Bambach, "Classes and Adaptive Variety: The Ecology of Diversification in Marine Faunas  
455 Through the Phanerozoic" in *Phanerozoic Diversity Patterns*, J. W. Valentine, Ed. (Princeton  
456 University Press, 1986), pp. 191-254.
  - 457 4. D. J. Bottjer, W. I. Ausich, Phanerozoic development of tiering in soft substrata suspension-  
458 feeding communities. *Paleobiology* **12**, 400-420 (2016).  
459 <https://doi.org/10.1017/s0094837300003134>
  - 460 5. J. J. Sepkoski, Biodiversity: Past, Present, and Future. *J Paleontol* **71**, 533-539 (2015).  
461 <https://doi.org/10.1017/s0022336000040026>
  - 462 6. G. J. Vermeij, Adaptation, Versatility, and Evolution. *Syst Zool* **22** (1973).  
463 <https://doi.org/10.2307/2412953>
  - 464 7. A. J. W. Hendy, "Taphonomic Overprints on Phanerozoic Trends in Biodiversity: Lithification and  
465 Other Secular Megabiases" in *Taphonomy*, P. A. Allison, D. J. Bottjer, Eds. (Springer, Dordrecht,  
466 2010), pp. 19-77.
  - 467 8. S. E. Peters, Geologic constraints on the macroevolutionary history of marine animals. *Proc Natl*  
468 *Acad Sci USA* **102**, 12326-12331 (2005). <https://doi.org/10.1073/pnas.0502616102>
  - 469 9. S. E. Peters, M. Foote, Biodiversity in the Phanerozoic: a reinterpretation. *Paleobiology* **27**, 583-  
470 601 (2016). [https://doi.org/10.1666/0094-8373\(2001\)027<0583:Bitpar>2.0.Co;2](https://doi.org/10.1666/0094-8373(2001)027<0583:Bitpar>2.0.Co;2)
  - 471 10. A. H. Knoll, Paleobiological Perspectives on Early Microbial Evolution. *Cold Spring Harbor*  
472 *Perspectives in Biology* **7**, a018093 (2015). <https://doi.org/10.1101/cshperspect.a018093>
  - 473 11. J. W. Schopf, Disparate rates, differing fates: tempo and mode of evolution changed from the  
474 Precambrian to the Phanerozoic. *Proc Natl Acad Sci USA* **91**, 6735-6742 (1994).  
475 <https://doi.org/10.1073/pnas.91.15.6735>
  - 476 12. D. H. Erwin, Evolutionary uniformitarianism. *Dev Biol* **357**, 27-34 (2011).  
477 <https://doi.org/10.1016/j.ydbio.2011.01.020>
  - 478 13. Z. R. Adam, M. L. Skidmore, D. W. Mogk, N. J. Butterfield, A Laurentian record of the earliest  
479 fossil eukaryotes. *Geology* **45**, 387-390 (2017). <https://doi.org/10.1130/g38749.1>
  - 480 14. Z. Yin, M. Zhu, D. J. Bottjer, F. Zhao, P. Tafforeau, Meroblastic cleavage identifies some Ediacaran  
481 Doushantuo (China) embryo-like fossils as metazoans. *Geology* **44**, 735-738 (2016).  
482 <https://doi.org/10.1130/g38262.1>

- 483 15. N. J. Butterfield, *Bangiomorpha pubescens* n. gen., n. sp.: implications for the evolution of sex,  
484 multicellularity, and the Mesoproterozoic/Neoproterozoic radiation of eukaryotes. *Paleobiology*  
485 **26**, 386-404 (2000). [https://doi.org/10.1666/0094-8373\(2000\)026<0386:Bpngns>2.0.Co;2](https://doi.org/10.1666/0094-8373(2000)026<0386:Bpngns>2.0.Co;2)
- 486 16. Q. Tang, K. Pang, X. Yuan, S. Xiao, A one-billion-year-old multicellular chlorophyte. *Nat Ecol Evol*  
487 **4**, 543-549 (2020). <https://doi.org/10.1038/s41559-020-1122-9>
- 488 17. S. Golubic, L. Seong-Joo, Early cyanobacterial fossil record: preservation, palaeoenvironments  
489 and identification. *Eur J Phycol* **34**, 339-348 (1999).  
490 <https://doi.org/10.1080/09670269910001736402>
- 491 18. J. W. Schopf, The paleobiological record of photosynthesis. *Photosynth Res* **107**, 87-101 (2011).  
492 <https://doi.org/10.1007/s11120-010-9577-1>
- 493 19. M. Schidlowski, Carbon isotopes as biogeochemical recorders of life over 3.8 Ga of Earth history:  
494 evolution of a concept. *Precambrian Res* **106**, 117-134 (2001). <https://doi.org/Doi>  
495 10.1016/S0301-9268(00)00128-5
- 496 20. B. L. Beard, Iron Isotope Biosignatures. *Science* **285**, 1889-1892 (1999).  
497 <https://doi.org/10.1126/science.285.5435.1889>
- 498 21. A. K. Garcia, C. M. Cavanaugh, B. Kacar, The curious consistency of carbon biosignatures over  
499 billions of years of Earth-life coevolution. *ISME J* (2021). [https://doi.org/10.1038/s41396-021-](https://doi.org/10.1038/s41396-021-00971-5)  
500 [00971-5](https://doi.org/10.1038/s41396-021-00971-5)
- 501 22. A. D. Anbar, O. Rouxel, Metal Stable Isotopes in Paleoceanography. *Annu Rev Earth Pl Sc* **35**,  
502 717-746 (2007). <https://doi.org/10.1146/annurev.earth.34.031405.125029>
- 503 23. J. W. Schopf *et al.*, Sulfur-cycling fossil bacteria from the 1.8-Ga Duck Creek Formation provide  
504 promising evidence of evolution's null hypothesis. *Proc Natl Acad Sci USA* **112**, 2087-2092  
505 (2015). <https://doi.org/10.1073/pnas.1419241112>
- 506 24. J. Krissansen-Totton, R. Buick, D. C. Catling, A statistical analysis of the carbon isotope record  
507 from the Archean to Phanerozoic and implications for the rise of oxygen. *Am J Sci* **315**, 275-316  
508 (2015). <https://doi.org/10.2475/04.2015.01>
- 509 25. M. Schidlowski, A 3,800-Million-Year Isotopic Record of Life from Carbon in Sedimentary-Rocks.  
510 *Nature* **333**, 313-318 (1988). <https://doi.org/10.1038/333313a0>
- 511 26. J. W. Schopf, K. Kitajima, M. J. Spicuzza, A. B. Kudryavtsev, J. W. Valley, SIMS analyses of the  
512 oldest known assemblage of microfossils document their taxon-correlated carbon isotope  
513 compositions. *Proc Natl Acad Sci USA* **115**, 53-58 (2018).  
514 <https://doi.org/10.1073/pnas.1718063115>
- 515 27. E. A. Bell, P. Boehnke, T. M. Harrison, W. L. Mao, Potentially biogenic carbon preserved in a 4.1  
516 billion-year-old zircon. *Proc Natl Acad Sci USA* **112**, 14518-14521 (2015).  
517 <https://doi.org/10.1073/pnas.1517557112>
- 518 28. K. M. Scott *et al.*, Kinetic isotope effect and biochemical characterization of form IA RubisCO  
519 from the marine cyanobacterium *Prochlorococcus marinus* MIT9313. *Limnol Oceanogr* **52**, 2199-  
520 2204 (2007).
- 521 29. R. D. Guy, M. L. Fogel, J. A. Berry, Photosynthetic fractionation of the stable isotopes of oxygen  
522 and carbon. *Plant Physiol* **101**, 37-47 (1993). <https://doi.org/10.1104/pp.101.1.37>
- 523 30. S. von Caemmerer, Y. Tazoe, J. R. Evans, S. M. Whitney, Exploiting transplastomically modified  
524 Rubisco to rapidly measure natural diversity in its carbon isotope discrimination using tuneable  
525 diode laser spectroscopy. *J Exp Bot* **65**, 3759-3767 (2014). <https://doi.org/10.1093/jxb/eru036>
- 526 31. C. A. Roeske, M. H. O'Leary, Carbon isotope effects on the enzyme-catalysed carboxylation of  
527 ribulose biphosphate. *Biochemistry* **23**, 6275-6284 (1984).
- 528 32. M. Eichner, S. Thoms, S. A. Kranz, B. Rost, Cellular inorganic carbon fluxes in *Trichodesmium*: a  
529 combined approach using measurements and modelling. *J Exp Bot* **66**, 749-759 (2015).  
530 <https://doi.org/10.1093/jxb/eru427>

- 531 33. K. H. Freeman, J. M. Hayes, Fractionation of carbon isotopes by phytoplankton and estimates of  
532 ancient CO<sub>2</sub> levels. *Global Biogeochem Cycles* **6**, 185-198 (1992).  
533 <https://doi.org/10.1029/92gb00190>
- 534 34. S. J. Hurley, B. A. Wing, C. E. Jasper, N. C. Hill, J. C. Cameron, Carbon isotope evidence for the  
535 global physiology of Proterozoic cyanobacteria. *Sci Adv* **7** (2021).  
536 <https://doi.org/10.1126/sciadv.abc8998>
- 537 35. E. B. Wilkes, R. B. Y. Lee, H. L. O. McClelland, R. E. M. Rickaby, A. Pearson, Carbon isotope ratios  
538 of coccolith-associated polysaccharides of *Emiliana huxleyi* as a function of growth rate and CO<sub>2</sub>  
539 concentration. *Org Geochem* **119**, 1-10 (2018).  
540 <https://doi.org/10.1016/j.orggeochem.2018.02.006>
- 541 36. G. G. Tcherkez, G. D. Farquhar, T. J. Andrews, Despite slow catalysis and confused substrate  
542 specificity, all ribulose biphosphate carboxylases may be nearly perfectly optimized. *Proc Natl*  
543 *Acad Sci USA* **103**, 7246-7251 (2006). <https://doi.org/10.1073/pnas.0600605103>
- 544 37. R. A. Studer, P. A. Christin, M. A. Williams, C. A. Orengo, Stability-activity tradeoffs constrain the  
545 adaptive evolution of RubisCO. *Proc Natl Acad Sci USA* **111**, 2223-2228 (2014).  
546 <https://doi.org/10.1073/pnas.1310811111>
- 547 38. A. I. Flamholz *et al.*, Revisiting trade-offs between Rubisco kinetic parameters. *Biochemistry* **58**,  
548 3365-3376 (2019). <https://doi.org/10.1021/acs.biochem.9b00237>
- 549 39. D. B. McNevin *et al.*, Differences in carbon isotope discrimination of three variants of D-ribulose-  
550 1,5-bisphosphate carboxylase/oxygenase reflect differences in their catalytic mechanisms. *J Biol*  
551 *Chem* **282**, 36068-36076 (2007). <https://doi.org/10.1074/jbc.M706274200>
- 552 40. B. M. Berla *et al.*, Synthetic biology of cyanobacteria: unique challenges and opportunities. *Front*  
553 *Microbiol* **4** (2013). <https://doi.org/10.3389/fmicb.2013.00246>
- 554 41. Y. Chen, C. K. Holtman, A. Taton, S. S. Golden, "Functional Analysis of the *Synechococcus*  
555 *elongatus* PCC 7942 Genome" in *Functional Genomics and Evolution of Photosynthetic Systems*,  
556 R. Burnap, W. Vermaas, Eds. (Springer, Dordrecht, 2012), pp. 119-137.
- 557 42. B. Kacar, V. Hanson-Smith, Z. R. Adam, N. Boekelheide, Constraining the timing of the Great  
558 Oxidation Event within the Rubisco phylogenetic tree. *Geobiology* **15**, 628-640 (2017).  
559 <https://doi.org/10.1111/gbi.12243>
- 560 43. H. S. Yoon, J. D. Hackett, C. Ciniglia, G. Pinto, D. Bhattacharya, A Molecular Timeline for the  
561 Origin of Photosynthetic Eukaryotes. *Mol Biol Evol* **21**, 809-818 (2004).  
562 <https://doi.org/10.1093/molbev/msh075>
- 563 44. S. Maruyama, E. Kim, "Evolution of Photosynthetic Eukaryotes; Current Opinion, Perplexity, and  
564 a New Perspective" in *Symbiosis: Cellular, Molecular, Medical and Evolutionary Aspects*, M. Kloc,  
565 Ed. (Springer, Cham, 2020), pp. 337-351.
- 566 45. P. M. Shih *et al.*, Biochemical characterization of predicted Precambrian RuBisCO. *Nat Commun*  
567 **7**, 10382 (2016). <https://doi.org/10.1038/ncomms10382>
- 568 46. T. M. Gibson *et al.*, Precise age of *Bangiomorpha pubescens* dates the origin of eukaryotic  
569 photosynthesis. *Geology* **46**, 135-138 (2017). <https://doi.org/10.1130/g39829.1>
- 570 47. S. A. Crowe *et al.*, Atmospheric oxygenation three billion years ago. *Nature* **501**, 535-538 (2013).  
571 <https://doi.org/10.1038/nature12426>
- 572 48. A. D. Anbar *et al.*, A whiff of oxygen before the great oxidation event? *Science* **317**, 1903-1906  
573 (2007). <https://doi.org/10.1126/science.1140325>
- 574 49. J. Newman, C. I. Brändén, T. A. Jones, Structure determination and refinement of ribulose 1,5-  
575 bisphosphate carboxylase/oxygenase from *Synechococcus* PCC6301. *Acta Crystallogr D* **49**, 548-  
576 560 (1993). <https://doi.org/10.1107/s090744499300530x>



- 577 50. A. K. Garcia *et al.*, System-level effects of CO<sub>2</sub> and RuBisCO concentration on carbon isotope  
578 fractionation. bioRxiv [Preprint] (2021). <https://doi.org/10.1101/2021.04.20.440233> (accessed  
579 28 May 2021).
- 580 51. D. C. Catling, K. J. Zahnle, The Archean atmosphere. *Sci Adv* **6**, eaax1420 (2020).  
581 <https://doi.org/10.1126/sciadv.aax1420>
- 582 52. T. Zavřel, M. A. Sinetova, D. Búzová, P. Literáková, J. Červený, Characterization of a model  
583 cyanobacterium *Synechocystis* sp. PCC 6803 autotrophic growth in a flat-panel photobioreactor.  
584 *Eng Life Sci* **15**, 122-132 (2015). <https://doi.org/10.1002/elsc.201300165>
- 585 53. E. Szekeres, C. Sicora, N. Dragos, B. Druga, Selection of proper reference genes for the  
586 cyanobacterium *Synechococcus* PCC 7002 using real-time quantitative PCR. *FEMS Microbiol Lett*  
587 **359**, 102-109 (2014). <https://doi.org/10.1111/1574-6968.12574>
- 588 54. D. S. Kubien, S. M. Whitney, P. V. Moore, L. K. Jesson, The biochemistry of Rubisco in *Flaveria*. *J*  
589 *Exp Bot* **59**, 1767-1777 (2008). <https://doi.org/10.1093/jxb/erm283>
- 590 55. G. H. Rau, U. Riebesell, D. Wolf-Gladrow, A model of photosynthetic <sup>13</sup>C fractionation by marine  
591 phytoplankton based on diffusive molecular CO<sub>2</sub> uptake. *Mar Ecol Prog Ser* **133**, 275-285 (1996).  
592 <https://doi.org/10.3354/meps133275>
- 593 56. W. G. Mook, J. C. Bommerson, W. H. Staverman, Carbon isotope fractionation between  
594 dissolved bicarbonate and gaseous carbon dioxide. *Earth Planet Sc Lett* **22**, 169-176 (1974).  
595 [https://doi.org/10.1016/0012-821x\(74\)90078-8](https://doi.org/10.1016/0012-821x(74)90078-8)
- 596 57. L. H. Gunn, E. Martin Avila, R. Birch, S. M. Whitney, The dependency of red Rubisco on its  
597 cognate activase for enhancing plant photosynthesis and growth. *Proc Natl Acad Sci USA* **117**,  
598 25890-25896 (2020). <https://doi.org/10.1073/pnas.2011641117>
- 599 58. B. Kacar, X. Ge, S. Sanyal, E. A. Gaucher, Experimental Evolution of *Escherichia coli* Harboring an  
600 Ancient Translation Protein. *J Mol Evol* **84**, 69-84 (2017). [https://doi.org/10.1007/s00239-017-](https://doi.org/10.1007/s00239-017-9781-0)  
601 [9781-0](https://doi.org/10.1007/s00239-017-9781-0)
- 602 59. M. Goldsmith, D. S. Tawfik, Potential role of phenotypic mutations in the evolution of protein  
603 expression and stability. *Proc Natl Acad Sci USA* **106**, 6197-6202 (2009).  
604 <https://doi.org/10.1073/pnas.0809506106>
- 605 60. P.-A. Christin *et al.*, Evolutionary Switch and Genetic Convergence on *rbcL* following the  
606 Evolution of C<sub>4</sub> Photosynthesis. *Mol Biol Evol* **25**, 2361-2368 (2008).  
607 <https://doi.org/10.1093/molbev/msn178>
- 608 61. B. M. Long, B. Förster, S. B. Pulsford, G. D. Price, M. R. Badger, Rubisco proton production can  
609 drive the elevation of CO<sub>2</sub> within condensates and carboxysomes. *Proc Natl Acad Sci USA* **118**  
610 (2021). <https://doi.org/10.1073/pnas.2014406118>
- 611 62. R. Burnap, M. Hagemann, A. Kaplan, Regulation of CO<sub>2</sub> Concentrating Mechanism in  
612 Cyanobacteria. *Life* **5**, 348-371 (2015). <https://doi.org/10.3390/life5010348>
- 613 63. Jeffrey C. Cameron, Steven C. Wilson, Susan L. Bernstein, Cheryl A. Kerfeld, Biogenesis of a  
614 Bacterial Organelle: The Carboxysome Assembly Pathway. *Cell* **155**, 1131-1140 (2013).  
615 <https://doi.org/10.1016/j.cell.2013.10.044>
- 616 64. D. Shi, Y. Xu, F. M. M. Morel, Effects of the pH/pCO<sub>2</sub> control method on medium chemistry and  
617 phytoplankton growth. *Biogeosciences* **6**, 1199-1207 (2009). [https://doi.org/10.5194/bg-6-1199-](https://doi.org/10.5194/bg-6-1199-2009)  
618 [2009](https://doi.org/10.5194/bg-6-1199-2009)
- 619 65. J. M. Hayes, Factors controlling <sup>13</sup>C contents of sedimentary organic compounds: Principles and  
620 evidence. *Mar Geol* **113**, 111-125 (1993). [https://doi.org/10.1016/0025-3227\(93\)90153-m](https://doi.org/10.1016/0025-3227(93)90153-m)
- 621 66. R. R. Bidigare *et al.*, Consistent fractionation of <sup>13</sup>C in nature and in the laboratory: growth-rate  
622 effects in some haptophyte algae. *Global Biogeochem Cycles* **11**, 279-292 (1997).  
623 <https://doi.org/10.1029/96gb03939>

- 624 67. B. A. Schubert, A. H. Jahren, The effect of atmospheric CO<sub>2</sub> concentration on carbon isotope  
625 fractionation in C<sub>3</sub> land plants. *Geochim Cosmochim Acta* **96**, 29-43 (2012).  
626 <https://doi.org/10.1016/j.gca.2012.08.003>
- 627 68. B. Kacar, L. Guy, E. Smith, J. Baross, Resurrecting ancestral genes in bacteria to interpret ancient  
628 biosignatures. *Philos Trans R Soc A* **375** (2017). <https://doi.org/10.1098/rsta.2016.0352>
- 629 69. A. K. Garcia, H. McShea, B. Kolaczowski, B. Kacar, Reconstructing the evolutionary history of  
630 nitrogenases: Evidence for ancestral molybdenum-cofactor utilization. *Geobiology* **18**, 394-411  
631 (2020). <https://doi.org/10.1111/gbi.12381>
- 632 70. A. K. Garcia, B. Kacar, How to resurrect ancestral proteins as proxies for ancient  
633 biogeochemistry. *Free Radic Biol Med* **140**, 260-269 (2019).  
634 <https://doi.org/10.1016/j.freeradbiomed.2019.03.033>
- 635 71. V. Hanson-Smith, A. Johnson, PhyloBot: A Web Portal for Automated Phylogenetics, Ancestral  
636 Sequence Reconstruction, and Exploration of Mutational Trajectories. *PLoS Comput Biol* **12**,  
637 e1004976 (2016). <https://doi.org/10.1371/journal.pcbi.1004976>
- 638 72. A. Stamatakis, RAxML version 8: a tool for phylogenetic analysis and post-analysis of large  
639 phylogenies. *Bioinformatics* **30**, 1312-1313 (2014).  
640 <https://doi.org/10.1093/bioinformatics/btu033>
- 641 73. Z. Yang, PAML 4: phylogenetic analysis by maximum likelihood. *Mol Biol Evol* **24**, 1586-1591  
642 (2007). <https://doi.org/10.1093/molbev/msm088>
- 643 74. Y. Liu, B. Schmidt, D. L. Maskell, MSAProbs: multiple sequence alignment based on pair hidden  
644 Markov models and partition function posterior probabilities. *Bioinformatics* **26**, 1958-1964  
645 (2010). <https://doi.org/10.1093/bioinformatics/btq338>
- 646 75. N. Lartillot, H. Philippe, A Bayesian mixture model for across-site heterogeneities in the amino-  
647 acid replacement process. *Mol Biol Evol* **21**, 1095-1109 (2004).  
648 <https://doi.org/10.1093/molbev/msh112>
- 649 76. S. Whelan, N. Goldman, A general empirical model of protein evolution derived from multiple  
650 protein families using a maximum-likelihood approach. *Mol Biol Evol* **18**, 691-699 (2001).  
651 <https://doi.org/10.1093/oxfordjournals.molbev.a003851>
- 652 77. F. Abascal, R. Zardoya, D. Posada, ProtTest: selection of best-fit models of protein evolution.  
653 *Bioinformatics* **21**, 2104-2105 (2005). <https://doi.org/10.1093/bioinformatics/bti263>
- 654 78. W. M. Fitch, Toward Defining the Course of Evolution: Minimum Change for a Specific Tree  
655 Topology. *Syst Zool* **20** (1971). <https://doi.org/10.2307/2412116>
- 656 79. R. Rippka, J. Deruelles, J. B. Waterbury, M. Herdman, R. Y. Stanier, Generic Assignments, Strain  
657 Histories and Properties of Pure Cultures of Cyanobacteria. *Microbiology* **111**, 1-61 (1979).  
658 <https://doi.org/https://doi.org/10.1099/00221287-111-1-1>
- 659 80. K. Sprouffske, A. Wagner, Growthcurver: an R package for obtaining interpretable metrics from  
660 microbial growth curves. *BMC Bioinformatics* **17**, 172 (2016). <https://doi.org/10.1186/s12859-016-1016-7>
- 661
- 662 81. E. M. Clerico, J. L. Ditty, S. S. Golden, Specialized techniques for site-directed mutagenesis in  
663 cyanobacteria. *Methods Mol Biol* **362**, 155-171 (2007). [https://doi.org/10.1007/978-1-59745-257-1\\_11](https://doi.org/10.1007/978-1-59745-257-1_11)
- 664
- 665 82. D. S. Kubien, C. M. Brown, H. J. Kane, Quantifying the amount and activity of Rubisco in leaves.  
666 *Methods Mol Biol* **684**, 349-362 (2011). [https://doi.org/10.1007/978-1-60761-925-3\\_27](https://doi.org/10.1007/978-1-60761-925-3_27)
- 667 83. A. J. De Porcellinis *et al.*, Overexpression of bifunctional fructose-1,6-  
668 bisphosphatase/sedoheptulose-1,7-bisphosphatase leads to enhanced photosynthesis and  
669 global reprogramming of carbon metabolism in *Synechococcus* sp. PCC 7002. *Metabolic*  
670 *Engineering* **47**, 170-183 (2018). <https://doi.org/10.1016/j.ymben.2018.03.001>

- 671 84. T. Zavřel, M. Sinetova, J. Červený, Measurement of Chlorophyll *a* and Carotenoids Concentration  
672 in Cyanobacteria. *Bio-Protocol* 5 (2015). <https://doi.org/10.21769/BioProtoc.1467>  
673  
674  
675

676 **Figures and Figure Legends**

677

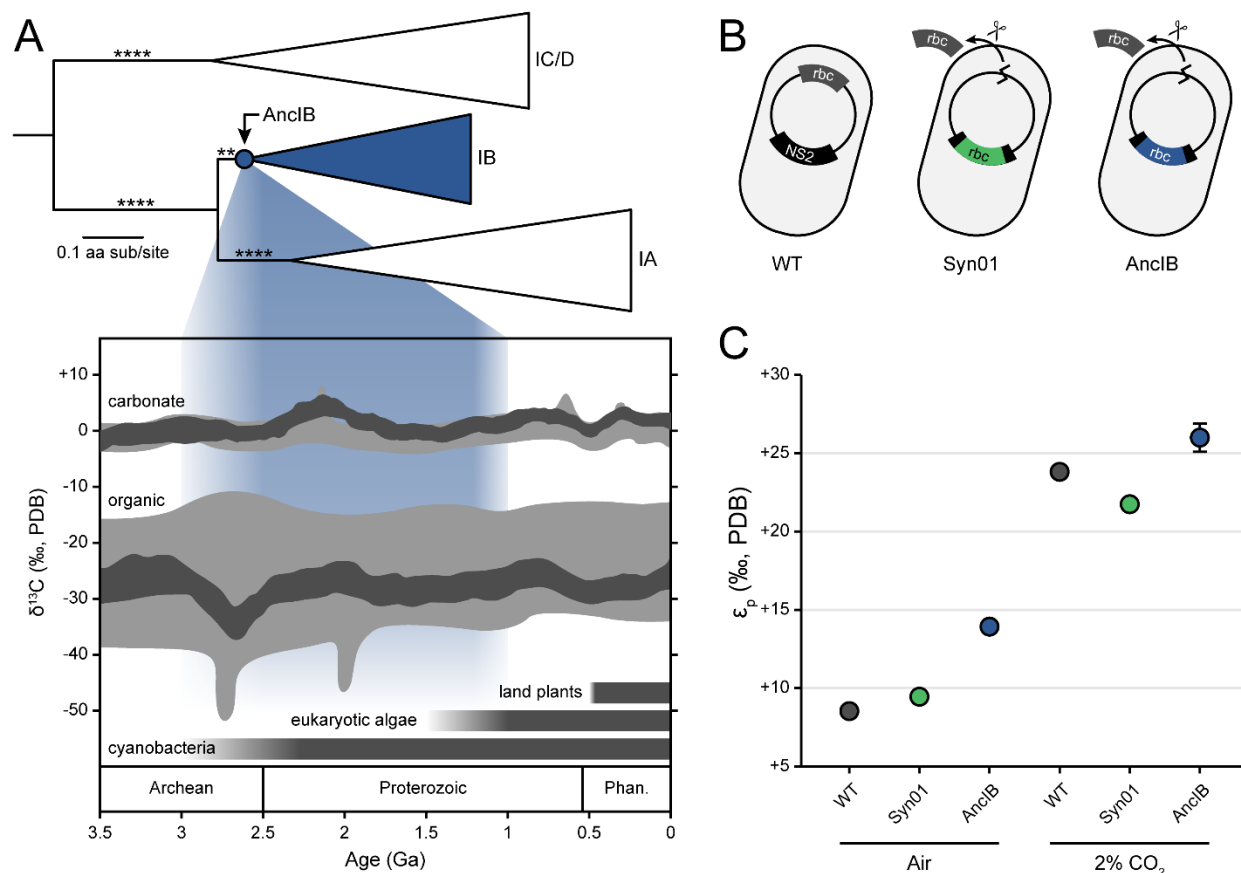

678 **Figure 1.** Reconstruction of ancestral RuBisCO biogeochemical signatures. (A) Maximum likelihood Form  
 679 I RuBisCO RbcL phylogeny (derived from full RuBisCO phylogeny described in Kacar et al. (42)). Ancestral  
 680 AnclB node and descendent Form IB clade highlighted in blue. Approximate likelihood ratio (aLR) branch  
 681 support indicated by asterisks (\*\*: >10, \*\*\*\*: >1000). Carbon isotope record figure adapted from Garcia  
 682 et al. (21), with data from Schidlowski et al. (25) (grey) and Krissansen-Totton et al. (24) (dark grey).  
 683 Approximate age range of AnclB indicated by blue field (see text for discussion). (B) Genetic engineering  
 684 of *S. elongatus* strains. Strain Syn01 was constructed by inserting a second copy of the *rbc* operon in the  
 685 chromosomal neutral site 2 (NS2). Strain AnclB was constructed by inserting the genetic sequence  
 686 encoding for the ancestral AnclB *rbcL* within the NS2 *rbc* operon. The native *rbc* operon was removed in  
 687 both strains Syn01 and AnclB. (C) Photosynthetic carbon isotope fractionation ( $\epsilon_p$ ) of *S. elongatus* strains  
 688 in this study, cultured in ambient air or 2% CO<sub>2</sub>. n = 3 for each data point and error bars indicate 1 $\sigma$   
 689 (error bars smaller than some datapoints).  
 690  
 691

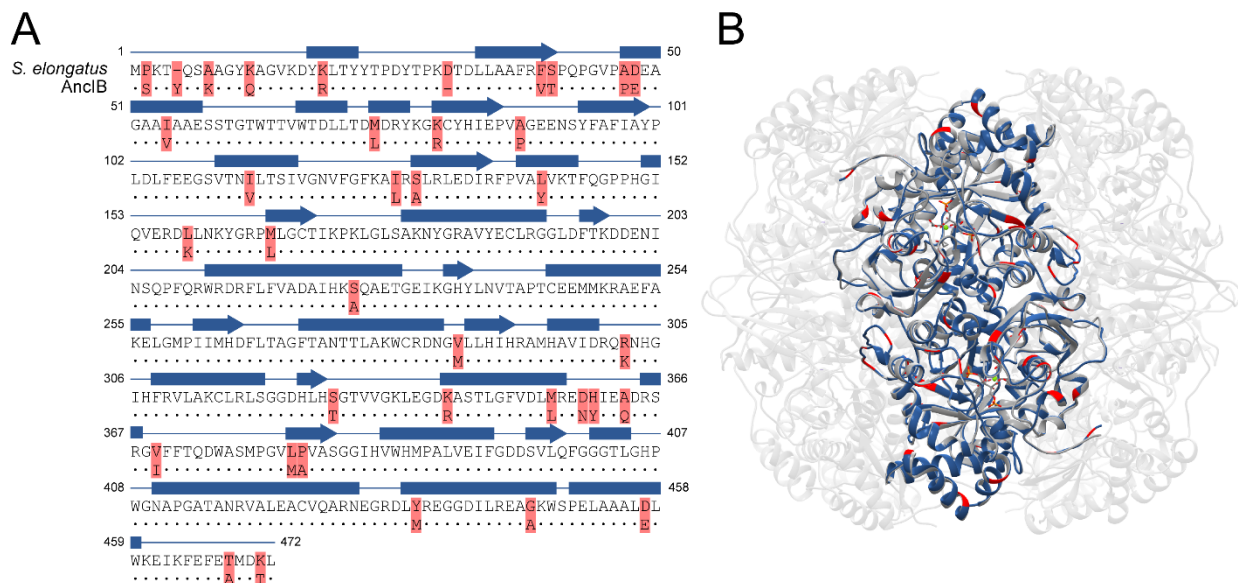

692  
693 **Figure 2.** Structure and sequence features of ancestral RuBisCO. (A) Amino acid sequence alignment  
694 between ancestral AncIB and extant *S. elongatus* RbcL. Ancestral site variation relative to the *S. elongatus*  
695 template is highlighted in red. (B) Modeled structure of the ancestral AncIB L<sub>2</sub> dimer (blue), aligned to the  
696 active conformation of the extant *S. elongatus* L<sub>3</sub>S<sub>8</sub> hexadecamer (grey; PDB: 1RBL (49)). Highlighted  
697 residues in (A) are also highlighted in (B). Site numbering from extant *S. elongatus*. Conserved residues  
698 are indicated by dots and secondary structure is indicated above the sequences (blue rectangle: α-helix;  
699 blue arrow: β-sheet).

700



701

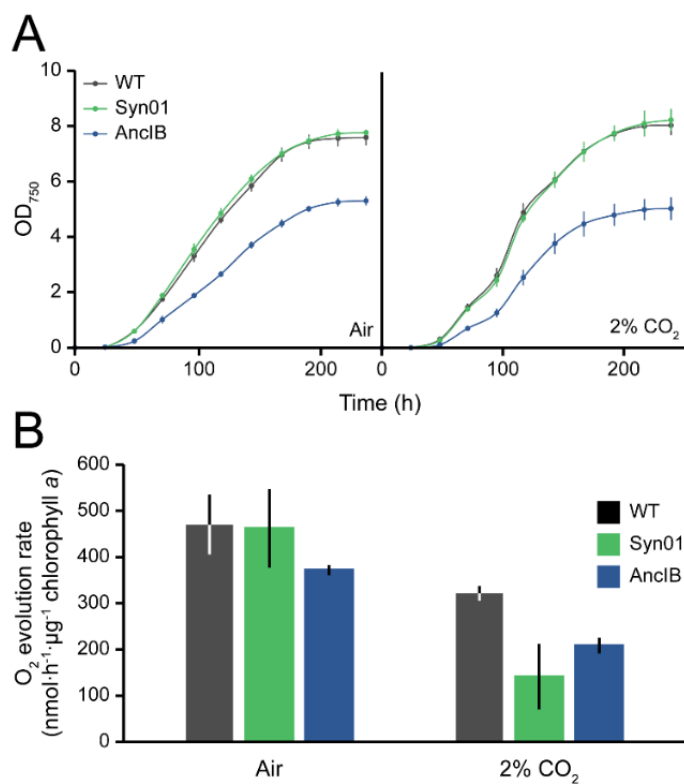

702

703

**Figure 3.** (A) Growth curves and (B) photosynthetic oxygen evolution of *S. elongatus* strains cultured in ambient air or 2% CO<sub>2</sub>. (A, B) n = 3 for each data point or bar and error bars indicate 1 $\sigma$ .

704

705

706

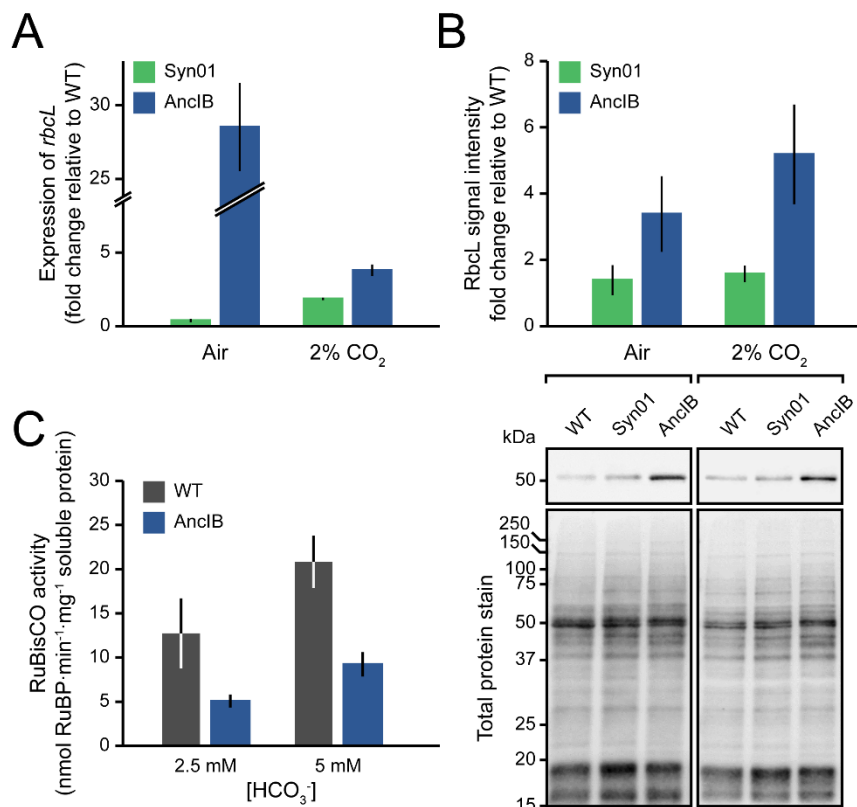

707  
 708 **Figure 4.** Expression and total cell activity of RuBisCO in *S. elongatus* strains. (A) Expression of *rbcl* in  
 709 Syn01 and AncIB detected by RT-qPCR (*secA* reference gene), relative to WT. (B) Immunodetection of  
 710 RbcL protein. *Top*, RbcL signal intensities normalized to those for total soluble protein load. *Bottom*,  
 711 Western blot showing RbcL protein detected by anti-RuBisCO antibody and total protein stain from  
 712 crude cell lysates (C) Total cell RuBisCO activity, measured with 2.5 mM and 5 mM HCO<sub>3</sub><sup>-</sup> concentrations.  
 713 (A-C) n = 3 for each bar (except 2% CO<sub>2</sub> RbcL signal intensity data, n = 6) and error bars indicate 1σ.

714  
 715  
 716

717 **Tables**

718

719 **Table 1.** Strains and plasmids used in this study.

| Strain or plasmid | Description/Genotype                                                                                                                                                                                                                       | Antibiotic resistance | Source/Reference               |
|-------------------|--------------------------------------------------------------------------------------------------------------------------------------------------------------------------------------------------------------------------------------------|-----------------------|--------------------------------|
| WT                | Wild-type strain of <i>S. elongatus</i> PCC 7942                                                                                                                                                                                           | -                     | Susan S. Golden (UC San Diego) |
| Syn01             | <i>S. elongatus</i> strain Syn02 with the native <i>rbc</i> operon removed: Syn02 and $\Delta(rbcL-rbcS-purK)::aadA$ .                                                                                                                     | Km, Sp+Sm             | (50)                           |
| Syn02             | <i>S. elongatus</i> PCC 7942 carrying a second copy of the <i>rbc</i> operon and flanking sequences at NS2: NS2:: <i>aphI-rbcL-rbcS-purK-Synpcc7942_1429-Synpcc7942_1430</i>                                                               | Km                    | (50)                           |
| Syn03             | <i>S. elongatus</i> PCC 7942 carrying a modified copy of the <i>rbc</i> operon (with the ancestral <i>rbcL</i> ) and flanking sequences at NS2: NS2:: <i>aphI-ancIB-rbcS-purK-Synpcc7942_1429-Synpcc7942_1430</i>                          | Km, Sp+Sm             | This study                     |
| AncIB             | <i>S. elongatus</i> strain Syn03 carrying the ancestral AncIB <i>rbcL</i> gene in the <i>rbc</i> operon copy at NS2 and having the native <i>rbc</i> operon replaced with a Sp/Sm resistance gene: $\Delta(rbcL-rbcS-purK)::aadA$ .        | Km                    | This study                     |
| pSyn01            | Plasmid to replace <i>S. elongatus</i> ' native <i>rbc</i> operon (CP000100: 1479070-1482595) with a Sp/Sm resistance gene: $\Delta(rbcL-rbcS-purK)::aadA$ .                                                                               | Sp+Sm                 | This study                     |
| pSyn02            | Plasmid for recombination at NS2 of <i>S. elongatus</i> chromosome carrying the <i>rbc</i> operon including <i>rbcL</i> , <i>rbcS</i> , <i>purK</i> , and flanking sequences from <i>S. elongatus</i> PCC 7942 (CP000100: 1479071-1484283) | Km                    | (50)                           |
| pSyn03            | pSyn02 in which the coding sequence of RbcL was replaced with the coding sequence of AncIB                                                                                                                                                 | Km                    | This study                     |

720

721

722

723 **Table 2.** Growth parameters of *S. elongatus* strains. Values represent the mean of three replicates  $\pm 1\sigma$ .  
724 Asterisks indicate significance relative to WT for the same atmospheric condition, determined by one-  
725 way ANOVA and post-hoc Tukey HSD tests (\*\*:  $p < 0.01$ ; \*\*\*:  $p < 0.001$ ).  
726

| Strain | Atmosphere         | Doubling time (h) | Midpoint time (h) | Maximum cell density (OD <sub>750</sub> ) |
|--------|--------------------|-------------------|-------------------|-------------------------------------------|
| WT     | Air                | 18.9 $\pm$ 1.0    | 106.4 $\pm$ 2.8   | 7.7 $\pm$ 0.3                             |
| Syn01  |                    | 18.6 $\pm$ 0.3    | 103.8 $\pm$ 1.9   | 7.7 $\pm$ 0.1                             |
| AncIB  |                    | 20.5 $\pm$ 0.4    | 118.4 $\pm$ 2.1** | 5.4 $\pm$ 0.2***                          |
| WT     | 2% CO <sub>2</sub> | 16.9 $\pm$ 1.5    | 110.8 $\pm$ 6.1   | 8.0 $\pm$ 0.3                             |
| Syn01  |                    | 17.3 $\pm$ 1.0    | 113.9 $\pm$ 2.3   | 8.1 $\pm$ 0.5                             |
| AncIB  |                    | 15.8 $\pm$ 0.5    | 117.8 $\pm$ 1.7   | 5.0 $\pm$ 0.4***                          |

727  
728  
729

730 **Supplemental Information**

731  
732

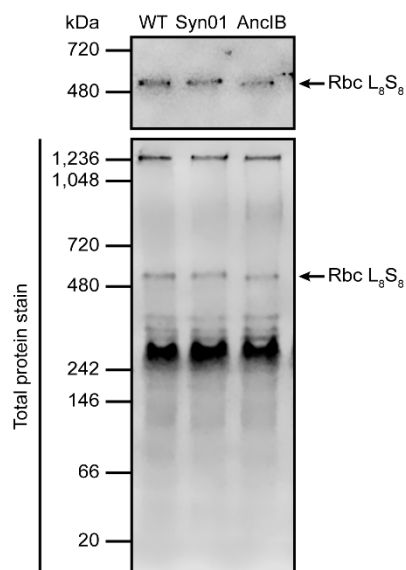

733 **Figure S1.** Immunodetection of assembled RuBisCO. Western blot showing the assembly of RbcL (WT and  
734 AnclB) and RbcS into the  $L_8S_8$  hexadecameric complex (520 kDa), detected by anti-RbcL antibody.  
735  
736

737

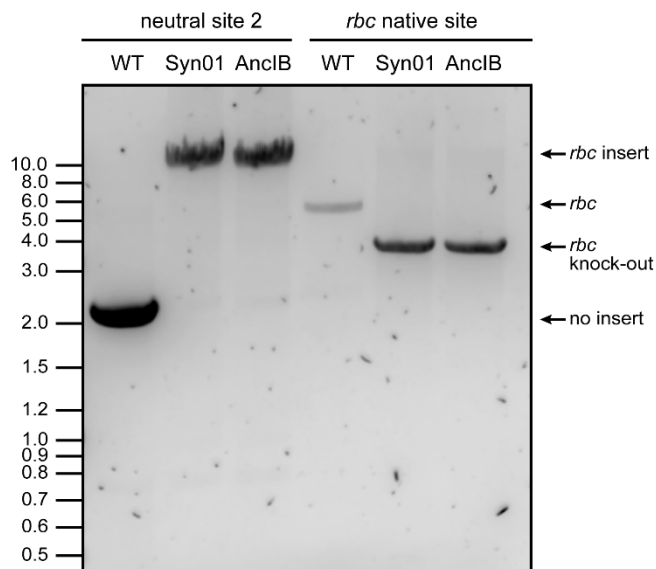

738 **Figure S2.** Genotyping of *S. elongatus* strains. Primers F06/R06 (Table S2) were used to confirm the *rbc*  
739 operon insertion at the neutral site 2 (NS2), either with WT *rbcL* (for Syn01) or AnclB *rbcL* (*rbc* insert:  
740 8,617 bp; no insert: 1,970 bp). Primers F07/R07 were used to confirm the presence or absence of the *rbc*  
741 operon at the native site (*rbc* present at its native site: 5,140 bp; *rbc* knocked out and replaced with the  
742 *aadA* gene: 3,342 bp).  
743

744  
745



746 **Table S1.** Isotopic composition of biomass and DIC in growth medium of *S. elongatus* cultures.

| Strain | Atmosphere         | $\delta^{13}\text{C}_{\text{biomass}}$ (‰) | $\delta^{13}\text{C}_{\text{DIC}}$ (‰) | $\delta^{13}\text{C}_{\text{CO}_2}$ (‰) | [DIC] (mM)  |
|--------|--------------------|--------------------------------------------|----------------------------------------|-----------------------------------------|-------------|
| WT     | Air                | -19.63 ± 0.07                              | -2.92 ± 0.02                           | -11.28 ± 0.02                           | 5.14 ± 0.07 |
|        | 2% CO <sub>2</sub> | -26.41 ± 0.15                              | 5.77 ± 0.30                            | -2.59 ± 0.30                            | 7.35 ± 0.24 |
| Syn01  | Air                | -20.20 ± 0.19                              | -2.63 ± 0.10                           | -11.00 ± 0.10                           | 5.23 ± 0.02 |
|        | 2% CO <sub>2</sub> | -26.84 ± 0.10                              | 3.29 ± 0.25                            | -5.07 ± 0.25                            | 7.53 ± 0.34 |
| AncIB  | Air                | -20.60 ± 0.08                              | 1.26 ± 0.10                            | -7.10 ± 0.10                            | 3.44 ± 0.05 |
|        | 2% CO <sub>2</sub> | -31.2 ± 0.34                               | 3.15 ± 0.62                            | -5.21 ± 0.62                            | 5.70 ± 0.70 |

747

748

749

**Table S2.** Primers used in this study.

| Primer <sup>a</sup> | Sequence (5'-3')           | Description                                                                                                                                                                                                                                                                                         |
|---------------------|----------------------------|-----------------------------------------------------------------------------------------------------------------------------------------------------------------------------------------------------------------------------------------------------------------------------------------------------|
| <b>F06</b>          | GACAATCCTGTTCTCCGGCA       | Genotyping <i>S. elongatus</i> strains to screen for the <i>rbc</i> operon insert (either with native or AncIB <i>rbcl</i> ) at NS2 (PCR product size: with <i>rbc</i> insert – 8,617 bp, without <i>rbc</i> insert – 1,970 bp).                                                                    |
| <b>R06</b>          | ATCAACGCCGTACCCGTATC       |                                                                                                                                                                                                                                                                                                     |
| <b>F07</b>          | GGAGTCAATTCTGCAAGAGC       | Genotyping <i>S. elongatus</i> strains to confirm the presence or absence of the <i>rbc</i> operon at the native site (PCR product size: with the <i>rbc</i> operon – 5,140 bp, without the <i>rbc</i> operon – 3,342 bp) R07 was also used to sequence the native <i>rbc</i> operon deletion site. |
| <b>R07</b>          | TCAAGCTCGGTCTACTGC         |                                                                                                                                                                                                                                                                                                     |
| <b>F08</b>          | GAATGCTCCGCTGGACTTGC       | Sequencing the <i>rbc</i> operon insertion site at NS2. F08 was also used to sequence the native <i>rbc</i> operon deletion site.                                                                                                                                                                   |
| <b>R08</b>          | TGTACTIONGATTTGTGCAGCG     |                                                                                                                                                                                                                                                                                                     |
| <b>F09</b>          | ACCACCTTGGCAAATGGTG        | qPCR analysis of the expression of <i>rbcl</i> (ID: Synpcc7942_1426) that encodes the RuBisCO large subunit.                                                                                                                                                                                        |
| <b>R09</b>          | TTGTGCGCTTCCAGTTTGC        |                                                                                                                                                                                                                                                                                                     |
| <b>F11</b>          | ATTACCTGCGGACAACATG        | qPCR analysis of the expression of <i>secA</i> (reference gene, ID: Synpcc7942_0289) that encodes the preprotein translocase subunit SecA.                                                                                                                                                          |
| <b>R11</b>          | TGCCGCATGTATTTTCGC         |                                                                                                                                                                                                                                                                                                     |
| <b>F13</b>          | GGAGCCTCTGACTATCGCTGGGGGAG | Linearization of pSyn02 without the <i>rbcl</i> coding sequence.                                                                                                                                                                                                                                    |
| <b>R13</b>          | GTCGTCTCTCCCTAGAGATATG     |                                                                                                                                                                                                                                                                                                     |
| <b>F14</b>          | AAACCGGCGAAATCAAAGGC       | qPCR analysis of the expression of AncIB <i>rbcl</i> that encodes the AncIB RuBisCO large subunit.                                                                                                                                                                                                  |
| <b>R14</b>          | CGTGCATGATGATGGGCATG       |                                                                                                                                                                                                                                                                                                     |
| <b>F15</b>          | TGTTTGAAGAAGGCAGCGTG       | Sequencing the internal region of AncIB <i>rbcl</i> inserted at NS2.                                                                                                                                                                                                                                |
| <b>F16</b>          | CCAAATGGTGCCGCGATAAC       |                                                                                                                                                                                                                                                                                                     |

750

<sup>a</sup>F - forward, R – reverse
